# Supplementary material for: Targeted deletion of the C-terminus of the mouse adenomatous polyposis coli tumor suppressor results in neurologic phenotypes related to schizophrenia
Source: PubMed Central journal article supplement (PMC3986642; doi:10.1186/1756-6606-7-21), 2014-03-29
Supplement: 1756-6606-7-21-S1.pdf [file 1756-6606-7-21-S1.pdf]

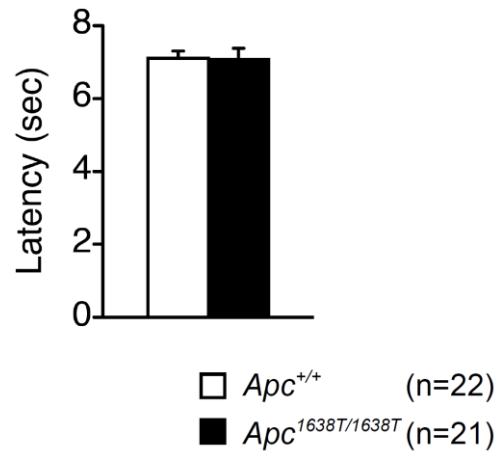

**Figure S1** No significant difference in the hot plate test between  $Apc^{+/+}$  and  $Apc^{1638T/1638T}$  mice.
