# Supplementary material for: Targeted deletion of the C-terminus of the mouse adenomatous polyposis coli tumor suppressor results in neurologic phenotypes related to schizophrenia
Source: PubMed Central journal article supplement (PMC3986642; doi:10.1186/1756-6606-7-21), 2014-03-29
Supplement: 1756-6606-7-21-S2.pdf [file 1756-6606-7-21-S2.pdf]

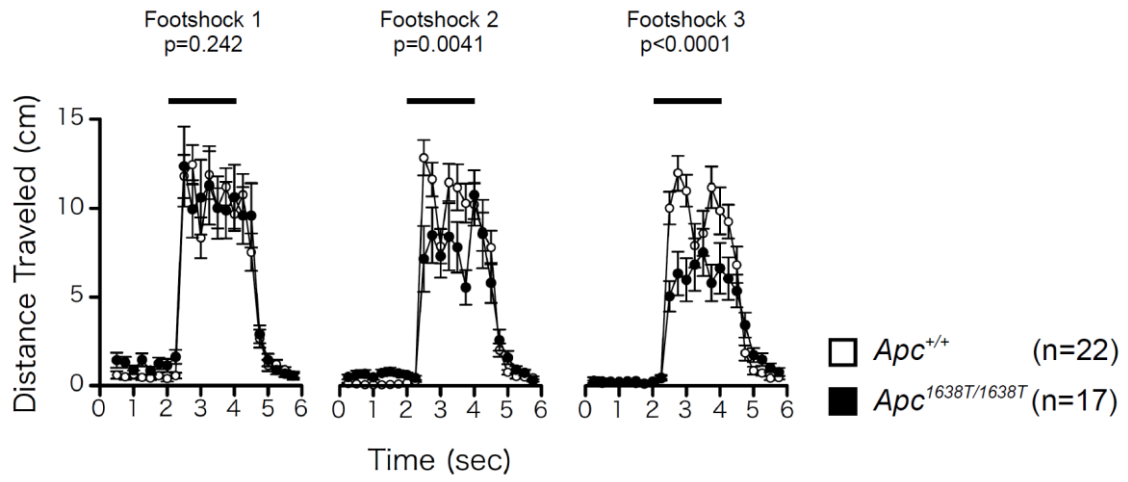

**Figure S2 Distance traveled during footshocks in the training phase of fear conditioning.** Footshocks were delivered at horizontal bars. The p values indicate genotype effect in two-way repeated measures ANOVA.
