# Supplementary material for: Targeted deletion of the C-terminus of the mouse adenomatous polyposis coli tumor suppressor results in neurologic phenotypes related to schizophrenia
Source: PubMed Central journal article supplement (PMC3986642; doi:10.1186/1756-6606-7-21), 2014-03-29
Supplement: 1756-6606-7-21-S3.pdf [file 1756-6606-7-21-S3.pdf]

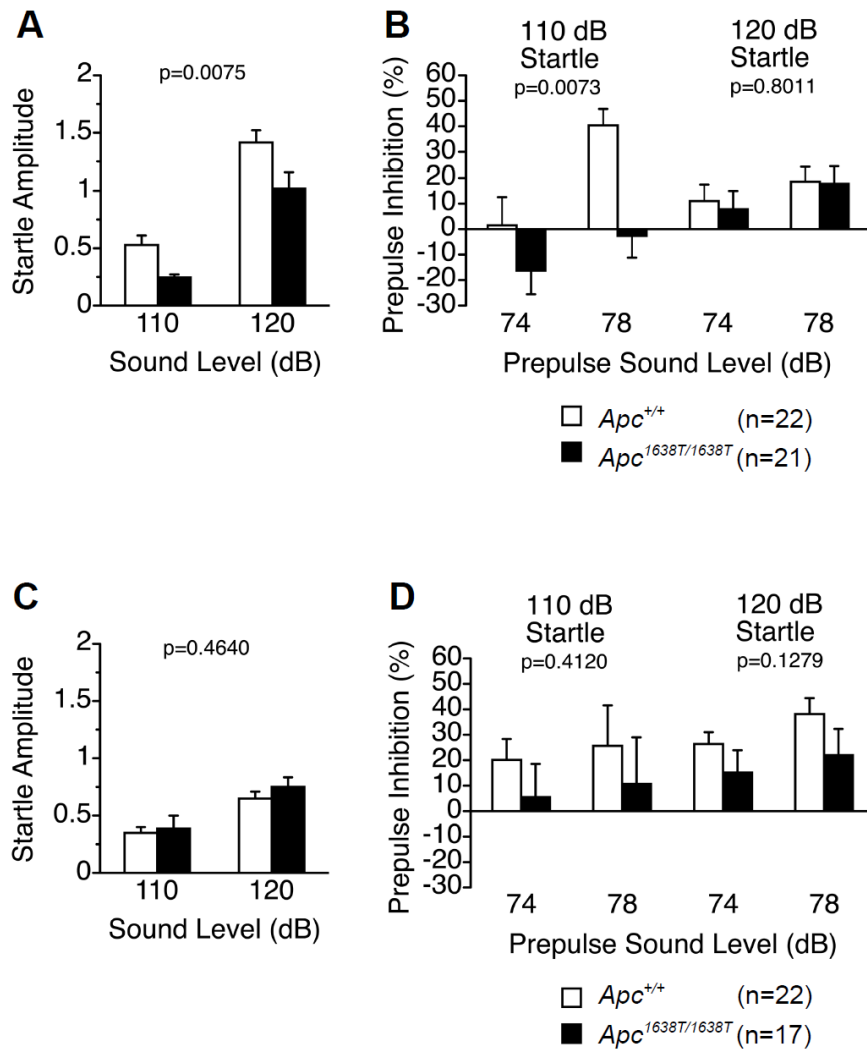

**Figure S3 Startle response/prepulse inhibition tests.** (A) Startle response and (B) prepulse inhibition examined in 13 to 16 weeks old mice. Since prepulse inhibition was not reliably seen in the wild-type mice, the same tests were repeated at 28 to 31 weeks (C and D). The p values in the figure indicate genotype effect in two-way repeated measures ANOVA.
