# Supplementary material for: Targeted deletion of the C-terminus of the mouse adenomatous polyposis coli tumor suppressor results in neurologic phenotypes related to schizophrenia
Source: PubMed Central journal article supplement (PMC3986642; doi:10.1186/1756-6606-7-21), 2014-03-29
Supplement: 1756-6606-7-21-S4.pdf [file 1756-6606-7-21-S4.pdf]

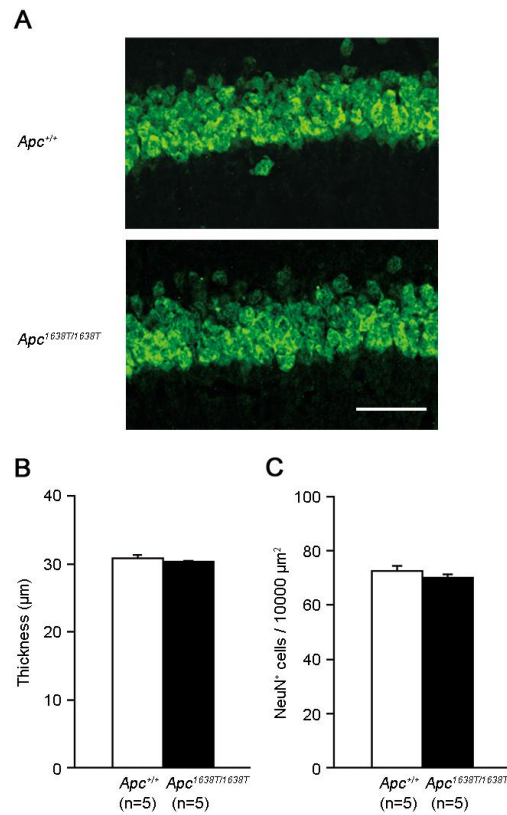

**Figure S4 No significant differences in the thickness of the pyramidal cell layer and the number of NeuN-immunoreactive cells in the hippocampal CA1 region between *Apc*<sup>+/+</sup> and *Apc*<sup>1638T/1638T</sup> mice. (A) Photomicrographs of NeuN-immunoreactive cells in the hippocampal CA1 region. (B) Thickness of the pyramidal cell layer in the hippocampal CA1 region. (C) Densities of NeuN-immunoreactive cells in the hippocampal CA1 region. Error bars indicate SEM. The scale bar represents 50 μm.**
