# Supplementary material for: Targeted deletion of the C-terminus of the mouse adenomatous polyposis coli tumor suppressor results in neurologic phenotypes related to schizophrenia
Source: PubMed Central journal article supplement (PMC3986642; doi:10.1186/1756-6606-7-21), 2014-03-29
Supplement: 1756-6606-7-21-S6.pdf [file 1756-6606-7-21-S6.pdf]

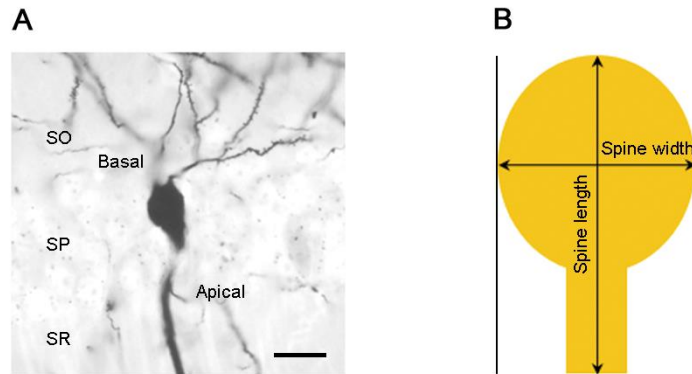

**Figure S6 Measuring spine morphology.** (A) Golgi-impregnated pyramidal neuron in the hippocampal CA1 region. SO: stratum oriens, SP: stratum pyramidale, SR: stratum radiatum, Basal: Basal side of the pyramidal neuron, Apical: Apical side of the pyramidal neuron. The scale bar represents 20  $\mu\text{m}$ . (B) Schematic drawing of a dendritic spine. Length indicates the longest length of the spine. The width is the shortest length between two lines parallel to the longest length of the spine.
